# Supplementary material
Source: publisher figshare collection journal article supplement (https://acs.figshare.com/ndownloader/files/19981976)
Supplement: Supplementary file 1 [file 19981976]

# Supporting Information: Scaling and Entanglement properties of neutral and sulfonated polystyrene.

Carlos G. Lopez<sup>1, a)</sup>

*Institute of Physical Chemistry, RWTH Aachen University, Landoltweg 2, 52056 Aachen, Germany*

## I. THE OVERLAP CONCENTRATION IN SALT-FREE SOLUTION

In this section we discuss the estimation of the power-law of the overlap concentration with the degree of polymerisation according to different methods. We begin by considering the various ways of estimating  $c^*$ , then discuss the possible sources of experimental error and the range over which we expect scaling to hold. Finally we provide estimate for the scaling exponents in salt-free solution.

### A. Estimation methods

Table S I lists three estimates for the overlap concentration: 1)  $c_\eta^*$ , estimated viscosimetrically using the  $\eta_{sp}(c^*) = 1$  criterion put forward by Colby and co-workers<sup>1</sup>. 2)  $c_{SAXS}^*$ , which is identified as the crossover point between  $q^* \propto c^{1/3}$  and  $q^* \propto c^{1/2}$ . 3)  $c_{LS/SAXS}^*$ , which follows the same procedure as for  $c_{SAXS}^*$ , but the dilute solution  $q^*$  data are from light scattering measurements.

For methods 2) and 3), the  $q^*$  vs.  $c$  relation is calculated by fitting dilute solution data to:

$$q^* = Bc^{1/3} \quad (S1)$$

where  $B$  is a fit parameter listed in Table S I,  $q^*$  is in  $\text{nm}^{-1}$  and  $c$  in units of moles of repeating units per  $\text{dm}^3$ . For  $q^*$  in semidilute solutions, we use Kaji et al's<sup>2</sup> relation:

$$q^* = 1.7c^{1/2} \quad (S2)$$

The overlap concentration is estimated as the crossover between Eqs. S1 and S2:

$$c_{SAXS}^* = \left(\frac{B}{1.7}\right)^6 \quad (S3)$$

Estimates of  $c_{SAXS}^*$  for which no values of  $B$  are listed in Table I are read of from the crossover between  $q^* \propto N^{1/3}$  to  $q^* \propto N^0$  in Ref. [2].

### B. Sources of error

The relaxation times of polyelectrolytes in salt-free solution increase with decreasing concentration, meaning that in order to obtain the zero-shear values of the viscosity, low shear-rates, often below what is typically achievable by capillary viscosimetry must be used. A significant part of the literature suffers from shear thinning effects. This issue has been discussed extensively in references<sup>1,3-5</sup>. The data selected for this study are expected to correspond to the zero-shear rate limit, following the criteria explained in the aforementioned references.

The high exponent in Eq. S3 means small errors in  $B$  can lead to relatively large errors in  $c^*$ . Aqueous solution of NaPSS always contain a finite amount of residual salt. Carbon dioxide from the air dissolves in water to form carbonic acid with a concentration of  $c_S \simeq 5 \times 10^{-6}$  M. Additional contamination may arise from leaching of ions from glass containers or from residual salt being present in the polymer powder, see references [1,6] for a discussion of this topic. The effect of added salt is to shrink polyelectrolyte chains, thereby increasing  $c^*$ . Viscosity measurements show the increase in  $c_\eta^*$  with increasing  $c_S$ , see for example refs. [1,4,7-9]. Scaling expects:

$$c^*[1 + 2c_S/(fc^*)]^{-1.5} = b'^{-3}N^{-2} \quad (S4)$$

where the various symbols have the same meaning as in the main text. According to Eq. S4, the effect of  $c_S$  on  $c^*$  becomes significant when  $c_S \gtrsim fc/2$ , i.e. when the number of salt ions exceeds that of free counterions.

The effect of residual salt on estimates for the overlap concentration using Eqs. S1-S3 is less clear. Addition of salt is known to shift  $q^*$  to lower values<sup>10</sup>, decreasing the value of  $B$  in Eq. S1. This in turn results in a lower value of  $c_{SAXS}^*$  when calculated from Eq. S3. This increase is of course artificial as  $c^*$  always increases with added  $c_S$ . All the values of  $c_{SAXS}^*$  are for  $fc \gg 2c_S$  where the effect of residual salt is expected to be negligible. For some of the estimates of  $c_{SAXS/LS}^*$  on the other hand  $fc \sim 2c_S$ , and the effect of residual salt could be significant. We are at present unable to provide a quantitative estimate for the effect of  $c_S$  on  $c_{SAXS/LS}^*$ .

### C. Range of validity of scaling

A final question before we determine the power-law exponent of  $c^*$  with  $N$  is the range over which scaling

<sup>a)</sup>lopez@pc.rwth-aachen.de

Table S I. Values for the overlap concentration in salt-free solution used in Figure 2 of the main text.

| Reference                | N     | $c_\eta^*$ (M) | $c_{SAXS}^*$ (M) | $c_{LS/SAXS}^*$ (M)  | Notes                                                                                                                              |
|--------------------------|-------|----------------|------------------|----------------------|------------------------------------------------------------------------------------------------------------------------------------|
| Uzum et al [11]          | 367   | 0.018          |                  |                      |                                                                                                                                    |
| Uzum et al [11]          | 155   | 0.227          |                  |                      |                                                                                                                                    |
| Uzum et al [11]          | 64    | 0.353          |                  |                      |                                                                                                                                    |
| Uzum et al [11]          | 32    | 0.635          | 0.305            |                      | $c_\eta^*$ extrapolated from $c < 0.3$ M data, $B$ calculated from $c = 0.08$ - $0.2$ M                                            |
| Uzum et al [11]          | 20    |                | 1.1              |                      | $B$ calculated from $c = 0.01$ - $0.1$ M                                                                                           |
| Lopez and Richtering [5] | 145.5 | 0.13           |                  |                      |                                                                                                                                    |
| Lopez and Richtering [5] | 319   | 0.027          |                  |                      |                                                                                                                                    |
| Lopez and Richtering [5] | 740   | 0.0045         |                  |                      |                                                                                                                                    |
| Lopez and Richtering [5] | 1305  | 0.0011         |                  |                      |                                                                                                                                    |
| Oostwal and Odijk [12]   | 155   | 0.09           |                  |                      |                                                                                                                                    |
| Oostwal and Odijk [12]   | 440   | 0.014          |                  |                      |                                                                                                                                    |
| Oostwal and Odijk [12]   | 885   | 0.0021         |                  |                      | $c_\eta^*$ extrapolated from data for $c = 0.027$ M $< c < 0.047$ M                                                                |
| Pavlov et al [13]        | 620   | 0.019          |                  |                      | Sample 6, $M_w$ recalculated from $[\eta]$ in 0.2M NaCl and MHS relation from Iwamoto et al <sup>14</sup>                          |
| Pavlov et al [13]        | 420   | 0.0445         |                  |                      | Sample 7, $M_w$ recalculated as above.                                                                                             |
| Pavlov et al [13]        | 265   | 0.0765         |                  |                      | Sample 8, $M_w$ recalculated as above.                                                                                             |
| Boris and Colby [1]      | 6060  | 0.00008        |                  |                      |                                                                                                                                    |
| Chen et al [15]          | 5942  |                |                  |                      |                                                                                                                                    |
| Chen et al [15]          | 4005  | 0.0003         |                  |                      |                                                                                                                                    |
| Chen et al [15]          | 2925  | 0.0005         |                  |                      |                                                                                                                                    |
| Chen et al [15]          | 1310  | 0.00078        |                  |                      |                                                                                                                                    |
| Yang [16]                | 1070  | 0.0115         |                  |                      |                                                                                                                                    |
| Yang [16]                | 445   | 0.095          |                  |                      |                                                                                                                                    |
| Cohen et al [6]          | 1060  | 0.0010         |                  |                      |                                                                                                                                    |
| Cohen et al [6]          | 885   | 0.0036         |                  |                      | Extrapolated from $c < 0.0025$ M                                                                                                   |
| Cohen et al [6]          | 690   | 0.0055         |                  |                      | Extrapolated from $c < 0.005$ M                                                                                                    |
| Ganter et al [17]        | 77000 | 0.000028       |                  |                      | $M_w$ corrected to $\simeq 15000$ kg/mol from $[\eta]$ in 0.1 M and Takahashi et al's <sup>18</sup> MSK relation, see also [5,19]. |
| Kaji et al [2]           | 9     |                | 1.3              |                      | Extracted from Fig. 5 of ref. [2]                                                                                                  |
| Kaji et al [2]           | 23    |                | 1.25             |                      | Extracted from Fig. 5 of ref. [2]                                                                                                  |
| Kaji et al [2]           | 40    |                | 0.73             |                      | Extracted from Fig. 5 of ref. [2]                                                                                                  |
| Kaji et al [2]           | 66    |                | 0.5              |                      | Extracted from Fig. 7 of ref. [2]                                                                                                  |
| Kaji et al [2]           | 84    |                | 0.3              |                      | Extracted from Fig. 7 of ref. [2]                                                                                                  |
| Kaji et al [2]           | 90    |                | 0.135            |                      | Extracted from Fig. 5 of ref. [2]                                                                                                  |
| Kaji et al [2]           | 110   |                | 0.2              |                      | Extracted from Fig. 7 of ref. [2]                                                                                                  |
| Kaji et al [2]           | 155   |                | 0.1              |                      | Extracted from Fig. 7 of ref. [2]                                                                                                  |
| Kaji et al [2]           | 210   |                | 0.05             |                      | Extracted from Fig. 7 of ref. [2]                                                                                                  |
| Kaji et al [2]           | 300   |                | 0.025            |                      | Extracted from Fig. 7 of ref. [2]                                                                                                  |
| Krause et al [20]        | 1770  |                |                  | $8.8 \times 10^{-4}$ | $B = 0.5252$ , full $c$ range                                                                                                      |
| Krause et al [20]        | 5300  |                |                  | $5 \times 10^{-3}$   | $B = 0.479$ , $c < 0.00018$ M                                                                                                      |
| Johner et al [21]        | 500   |                |                  | $5.3 \times 10^{-3}$ | $B = 0.7121$ full $c$ range                                                                                                        |
| Johner et al [21]        | 1000  |                |                  | $8.3 \times 10^{-4}$ | $B = 0.5206$ full $c$ range                                                                                                        |
| Johner et al [21]        | 2000  |                |                  | $3.4 \times 10^{-4}$ | $B = 0.4478$ full $c$ range                                                                                                        |

expects Eq. S4 to apply. In principle, no obvious upper limit is expected, at least within the experimental range of  $N$  considered in this study. According to Dobrynin et al's model, Eq. S4 should not hold when the end-to-end distance of NaPSS chains is smaller than the size of a thermal blob  $\xi_T$ . The latter has been estimated as  $\simeq 1$  nm from scattering measurements of the lateral chain dimensions of NaPSS<sup>22,23</sup>. Note that this value is smaller than the intrinsic Kuhn length of NaPSS and scaling ex-

pects  $\xi_T$  to always be larger than the monomer size.<sup>24</sup> Another way of estimating  $\xi_T$  is as the value of  $\xi$  at which Eq. S2 breaks down and a new scaling of  $q^* \propto c^{1/4}$ . This presumably corresponds to the value at which the concentrated regime sets in. This crossover has been measured by SAXS as  $c_D = 1.2$  M,<sup>25</sup> and gives  $\xi_T \simeq 3.3$  nm. A problem with this estimate is that in the concentrated regime, the chain size is expected to be independent of concentration, which is not observed experimentally.<sup>19</sup>

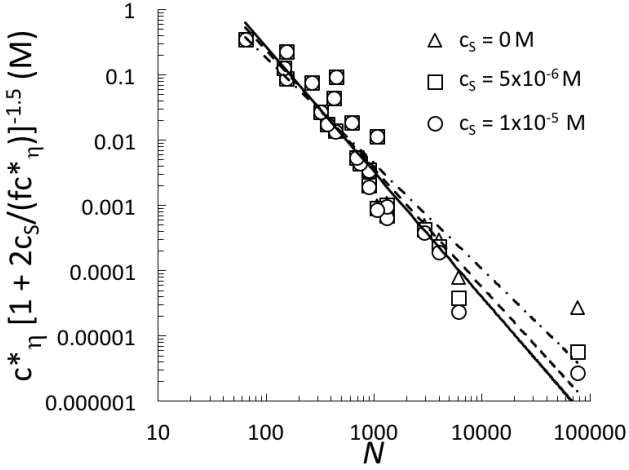

Figure S 1. Viscosimetric estimate of the overlap concentration corrected for the effect of residual salt according to Eq. S4. The different symbols correspond to different concentrations of residual salt, indicated on the legend. The lines are best fit power-laws. Full line:  $c_s = 10^{-5}$  M,  $c_{\eta}^*[1 + 2c_s/(fc_{\eta}^*)]^{-1.5} = 1800N^{-1.92}$ . Dashed line:  $c_s = 10^{-5}$  M,  $c_{\eta}^*[1 + 2c_s/(fc_{\eta}^*)]^{-1.5} = 980N^{-1.81}$ , dashed-dotted line:  $c_s = 10^{-5}$  M,  $c_{\eta}^*[1 + 2c_s/(fc_{\eta}^*)]^{-1.5} = 310N^{-1.62}$ . Data are from references listed in Table S I.

From Fig. 2 of the main text, a crossover in the scaling of  $c^*$  with  $N$  is apparent around  $c \simeq 1 - 1.2$  M or  $N \simeq 40$ . We therefore choose this as the  $N_{min}$  value for the following power-law fits.

#### D. Scaling of $c_{\eta}^*$ with $N$

Figure 1 plots  $c_{\eta}^*$  multiplied by a factor of  $[1 + 2c_s/(fc)]^{1.5}$  to correct for the effect of residual salt as a function of  $N$ . Three concentrations of residual salt are considered:  $c_s = 0$  M,  $c_s = 5 \times 10^{-6}$  M (the concentration expected from carbonic acid) and  $c_s = 10^{-5}$  M. The best fit exponent for the variation of the corrected  $c_{\eta}^*$  depends strongly on the assumed concentration of residual salt, largely due to the influence of the highest  $N$  datum. For  $N < 3000$ , nearly no effect of added salt is expected. A fit over this  $N$ -region gives  $c_{\eta}^* = 3690N^{-2.0 \pm 0.4}$ , in agreement with Dobrynin et al's prediction.<sup>24</sup>

#### E. Scaling of $c_{SAXS}^*$ with $N$

For the reasons discussed above, it is difficult to assess the reliability of  $c_{SAXS/LS}^*$ . If we fit all  $c_{SAXS/LS}^*$  and  $c_{SAXS}^*$  data for  $N > 40$ ,  $c_S^* = 787N^{1.84 \pm 0.25}$  is obtained, where the subscript  $S$  is used to indicate that the value refers to a combination of both SAXS and LS data, or  $c_S^* = 1973N^{2.0 \pm 0.2}$  if we do not include the two highest  $N$  data points, which, following the earlier discussion, may be affected by the residual salt content in the solution.

These best fit exponent are, within error, in agreement with the viscosimetric estimate. If we restrict the fit to Kaji et al's data for  $35 < N < 250$ ,  $c_{SAXS}^* = 680N^{1.7 \pm 0.3}$  is obtained. All the error bars quoted are 95% confidence intervals. The relation given in Fig 3 of the main paper corresponds to the best fit for  $40 < N < 2000$  with the exponent fixed at -2.

## II. SAMPLES

Table S II lists the different samples employed in this study.

Table S II. Molecular weight of samples used in this study. The polydispersity ( $pd$ ) and degree of sulfonation (D.S.) are estimated by the Polymer Standard Services as  $pd < 1.2$  and D.S.  $\simeq 0.95$  for all samples.

| Sample  | $M_w$ (g/mol)      | $pd$ |
|---------|--------------------|------|
| PSS30k  | $3.3 \times 10^4$  | 1.2  |
| PSS67k  | $6.7 \times 10^4$  | 1.2  |
| PSS145k | $1.45 \times 10^5$ | 1.2  |
| PSS220k | $2.1 \times 10^5$  | 1.2  |
| PSS425k | $4.25 \times 10^5$ | 1.2  |
| PSS466k | $4.66 \times 10^5$ | 1.2  |
| PSS666k | $6.66 \times 10^5$ | 1.2  |
| PSS1M   | $9.76 \times 10^5$ | 1.2  |
| PSS2M   | $2.07 \times 10^6$ | 1.2  |

## III. DETERMINATION OF ENTANGLEMENT CROSS-OVER IN SALT-FREE SOLUTION

Table S III lists the data presented in Figure 5a of the main text.  $\eta_{sp,NE}$  is the non-entangled viscosity, calculated following ref. [5]. The data for Figure 5b of the main text is compiled in Table S IV.

Table S III. Viscosity parameters for data in Fig. 5a of the main text.

| $c$ (M) | $\eta_{sp}$ | $\eta_{sp,NE}$ | $\eta_{sp}/\eta_{sp,NE}$ | Eq. 8a |
|---------|-------------|----------------|--------------------------|--------|
| 1.19    | 34800       | 2120           | 16.4                     | 39500  |
| 1.00    | 20200       | 1500           | 13.5                     | 18200  |
| 0.42    | 1520        | 428            | 3.54                     | 874    |
| 0.28    | 628         | 288            | 2.19                     | 388    |
| 0.17    | 347         | 196            | 1.77                     | 215    |
| 0.041   | 101         | 79.1           | 1.28                     | 79.3   |
| 0.031   | 74.8        | 67.7           | 1.11                     | 67.8   |
| 0.022   | 61.4        | 56.8           | 1.08                     | 56.8   |
| 0.016   | 52.4        | 48.5           | 1.08                     | 48.5   |
| 0.011   | 42.8        | 40.0           | 1.07                     | 40.0   |
| 0.011   | 42.3        | 39.2           | 1.08                     | 39.2   |
| 0.0057  | 26.5        | 28.1           | 0.945                    | 28.1   |

Table S IV. Specific viscosity data for Fig. 5b of the main text.

| Reference                | $N$   | $c = 1 \text{ M}$  | $c = 0.45 \text{ M}$ | $c = 0.2 \text{ M}$ | Notes                                                |
|--------------------------|-------|--------------------|----------------------|---------------------|------------------------------------------------------|
| This work                | 10350 | 20200              | 1900                 | 148.4               |                                                      |
| This work                | 4995  | 2900               | 500                  | 68.66               |                                                      |
| This work                | 3330  | 860                | 178                  | 35                  |                                                      |
| This work                | 2220  | 530                | 110                  | 27.7                |                                                      |
| Lopez and Richtering [5] | 1400  | 210                | 49.8                 | 13.8                |                                                      |
| Lopez and Richtering [5] | 740   | 57.8               | 18                   | 5.41                |                                                      |
| Lopez and Richtering [5] | 335   | 20                 | 7.32                 | 2.18                |                                                      |
| Lopez and Richtering [5] | 150   | 8                  | 2.95                 | 0.65                |                                                      |
| Uzum et al [11]          | 367   | 19.47 <sup>a</sup> | 8                    |                     | <sup>a</sup> Extrapolated from $c < 0.5 \text{ M}$   |
| Uzum et al [11]          | 155   | 5.11 <sup>a</sup>  | 1.95                 |                     | <sup>a</sup> Extrapolated from $c < 0.5 \text{ M}$   |
| Uzum et al [11]          | 64    | 3.16 <sup>a</sup>  | 1.3                  |                     | <sup>a</sup> Extrapolated from $c < 0.5 \text{ M}$   |
| Boris and Colby [1]      | 6060  |                    | 1900                 | 155                 |                                                      |
| Chen and Archer [15]     | 6063  |                    | 1060                 | 151                 |                                                      |
| Chen and Archer [15]     | 3890  |                    | 246                  | 55                  |                                                      |
| Chen and Archer [15]     | 2842  |                    | 141                  | 23                  |                                                      |
| Chen and Archer [15]     | 1275  |                    | 34.96                | 10.2                |                                                      |
| Oostwal and Odijk [12]   | 885   |                    | 19.4 <sup>b</sup>    | 10                  | <sup>b</sup> Extrapolated from $c < 0.437 \text{ M}$ |
| Oostwal and Odijk [12]   | 440   |                    |                      | 4.8                 |                                                      |
| Oostwal and Odijk [12]   | 155   |                    |                      | 1.7                 |                                                      |
| Oostwal [26]             | 995   |                    | 25                   |                     | Values read from Ref. [1]                            |
| Oostwal [26]             | 1990  |                    | 105                  |                     | Values read from Ref. [1]                            |
| Prini et al [27]         | 1500  |                    | 76                   | 24                  |                                                      |

#### IV. EFFECT OF TEMPERATURE AND ADDED SALT ON SOLUTION RHEOLOGY OF NAPSS

| $c_S \text{ (M)}$    | $\eta_0 \text{ (Pas)}$ | $\tau \text{ (s)}$ | $G_{int}^a \text{ (Pa)}$ | $G_c \text{ (Pa)}$ | $G_{osc}/G_{int}$ |
|----------------------|------------------------|--------------------|--------------------------|--------------------|-------------------|
| $6 \times 10^{-6}$   | 18                     | 0.055              | 327                      | 450                | 1.35              |
| $8.8 \times 10^{-2}$ | 10                     | 0.028              | 368                      | 490                | 1.33              |
| $4.4 \times 10^{-1}$ | 4.6                    | 0.0143             | 320                      | 410                | 1.29              |
| Average              |                        |                    | 340                      | 450                | 1.3               |

Table S V. Rheological parameters for  $c = 1 \text{ M}$  solutions of NaPSS with  $M_w = 2 \times 10^6 \text{ g/mol}$ . Steady shear parameters are estimated from fits in Fig. 2b. <sup>a</sup>  $G_{int} = \eta/\tau$ .

| $T \text{ (K)}$        | $a_\tau$ | $a_\eta$ | $\frac{a_\eta/a_\tau}{T/298K}$ |
|------------------------|----------|----------|--------------------------------|
| salt-free              |          |          |                                |
| 274                    | 1.55     | 1.43     | 1.00                           |
| 283                    | 1.33     | 1.3      | 1.03                           |
| 293                    | 1.17     | 1.18     | 1.03                           |
| 298                    | 1        | 1        | 1                              |
| $c_S = 0.44 \text{ M}$ |          |          |                                |
| 274                    | 1.8      | 7        | 1.02                           |
| 298                    | 1        | 1        | 1                              |

Table S VI. Shift factors to reduce viscosity data in Figure 2b onto a single flow curve.  $a_\eta$  and  $a_\tau$  are the vertical and horizontal shift factors respectively.

#### V. BIBLIOGRAPHY

- <sup>1</sup>Boris, D. C.; Colby, R. H. Rheology of Sulfonated Polystyrene Solutions. *Macromolecules* **1998**, *31*, 5746–5755
- <sup>2</sup>Kaji, K.; Urakawa, H.; Kanaya, T.; Kitamaru, R. Phase diagram of polyelectrolyte solutions. *Journal de Physique* **1988**, *49*, 993–1000
- <sup>3</sup>Krause, W. E.; Tan, J. S.; Colby, R. H. Semidilute solution rheology of polyelectrolytes with no added salt. *J. Polym. Sci., Part B: Polym. Phys.* **1999**, *37*, 3429–3437
- <sup>4</sup>Lopez, C. G.; Colby, R. H.; Graham, P.; Cabral, J. T. Viscosity and Scaling of Semiflexible Polyelectrolyte NaCMC in Aqueous Salt Solutions. *Macromolecules* **2016**, *50*, 332–338
- <sup>5</sup>Lopez, C. G.; Richtering, W. The Viscosity of Semidilute and Concentrated Non-Entangled Flexible Polyelectrolytes in Salt-Free Solution. *The Journal of Physical Chemistry B* **2019**,
- <sup>6</sup>Cohen, J.; Priel, Z.; Rabin, Y. Viscosity of dilute polyelectrolyte solutions. *The Journal of chemical physics* **1988**, *88*, 7111–7116
- <sup>7</sup>Di Cola, E.; Waigh, T. A.; Colby, R. H. Dynamic light scattering and rheology studies of aqueous solutions of amphiphilic sodium maleate containing copolymers. *Journal of Polymer Science Part B: Polymer Physics* **2007**, *45*, 774–785
- <sup>8</sup>Lopez, C. G.; Colby, R. H.; Cabral, J. T. Electrostatic and hydrophobic interactions in NaCMC aqueous solutions: Effect of degree of substitution. *Macromolecules* **2018**, *51*, 3165–3175
- <sup>9</sup>Lopez, C. G. Entanglement Properties of Polyelectrolytes in Salt-Free and Excess-Salt Solutions. *ACS Macro Letters* **2019**, 979–983
- <sup>10</sup>Nishida, K.; Kaji, K.; Kanaya, T.; Shibano, T. Added salt effect on the intermolecular correlation in flexible polyelectrolyte solutions: Small-angle scattering study. *Macromolecules* **2002**, *35*, 4084–4089
- <sup>11</sup>zm, C.; Christau, S.; von Klitzing, R. Structuring of polyelectrolyte (NaPSS) solutions in bulk and under confinement as a

- function of concentration and molecular weight. *Macromolecules* **2011**, *44*, 7782–7791
- <sup>12</sup>Oostwal, M.; Odijk, T. Novel dynamic scaling hypothesis for semidilute and concentrated solutions of polymers and polyelectrolytes. *Macromolecules* **1993**, *26*, 6489–6497
- <sup>13</sup>Pavlov, G. M.; Okatova, O. V.; Gubarev, A. S.; Gavrilova, I. I.; Panarin, E. F. Strong linear polyelectrolytes in solutions of extreme concentrations of one–one valent salt. Hydrodynamic study. *Macromolecules* **2014**, *47*, 2748–2758
- <sup>14</sup>Iwamoto, Y.; Hirose, E.; Norisuye, T. Electrostatic contributions to chain stiffness and excluded-volume effects in sodium poly(styrenesulfonate) solutions. *Polymer journal* **2000**, *32*, 428–434
- <sup>15</sup>Chen, S.-P.; Archer, L. A. Relaxation dynamics of salt-free polyelectrolyte solutions using flow birefringence and rheometry. *Journal of Polymer Science Part B: Polymer Physics* **1999**, *37*, 825–835
- <sup>16</sup>Yang, Y. Interpretation of Viscosity Behavior of a Polyelectrolyte in a Salt-Free Polar Solvent by Ion-Association. *Journal of Macromolecular Science, Part B* **2004**, *43*, 845–858
- <sup>17</sup>Ganter, J. L.; Milas, M.; Rinaudo, M. On the viscosity of sodium poly(styrene sulphonate), a flexible polyelectrolyte. *Polymer* **1992**, *33*, 113–116
- <sup>18</sup>Takahashi, A.; Kato, T.; Nagasawa, M. The second virial coefficient of polyelectrolytes. *The Journal of Physical Chemistry* **1967**, *71*, 2001–2010
- <sup>19</sup>Lopez, C. G.; Richtering, W. Conformation and dynamics of flexible polyelectrolytes in semidilute salt-free solutions. *The Journal of Chemical Physics* **2018**, *148*, 244902
- <sup>20</sup>Krause, R.; Maier, E.; Deggelmann, M.; Hagenbüchle, M.; Schulz, S.; Weber, R. Static light scattering by solutions of salt-free polyelectrolytes. *Physica A* **1989**, *160*, 135–147
- <sup>21</sup>Johner, C.; Kramer, H.; Batzill, S.; Graf, C.; Hagenbüchle, M.; Martin, C.; Weber, R. Static light scattering and electric birefringence experiments on saltfree solutions of poly(styrenesulfonate). *Journal de Physique II* **1994**, *4*, 1571–1584
- <sup>22</sup>Colby, R. H.; Boris, D. C.; Krause, W. E.; Tan, J. S. Polyelectrolyte conductivity. *J. Polym. Sci., Part B: Polym. Phys.* **1997**, *35*, 2951–2960
- <sup>23</sup>Kassapidou, K.; Jesse, W.; Kuil, M. E.; Lapp, A.; Egelhaaf, S.; van der Maarel, J. R. C. Structure and Charge Distribution in DNA and Poly(styrenesulfonate) Aqueous Solutions. *Macromolecules* **1997**, *30*, 2671–2684
- <sup>24</sup>Dobrynin, A. V.; Colby, R. H.; Rubinstein, M. Scaling Theory of Polyelectrolyte Solutions. *Macromolecules* **1995**, *28*, 1859–1871
- <sup>25</sup>Nishida, K.; Kaji, K.; Kanaya, T. High concentration crossovers of polyelectrolyte solutions. *J. Chem. Phys.* **2001**, *114*, 8671–8677
- <sup>26</sup>On the Dynamics of Semidilute Polyelectrolyte Solutions. Doctoral Dissertation. University of Leiden. 1994
- <sup>27</sup>Prini, R. F.; Lagos, A. Tracer diffusion, electrical conductivity, and viscosity of aqueous solutions of polystyrenesulfonates. *Journal of Polymer Science Part A: Polymer Chemistry* **1964**, *2*, 2917–2928
